# Supplementary material
Source: Springer Nature journal article supplement (https://www.springermedizin.de/resource/supplementary/12876_2008_345_MOESM8_ESM.pdf/9439210)

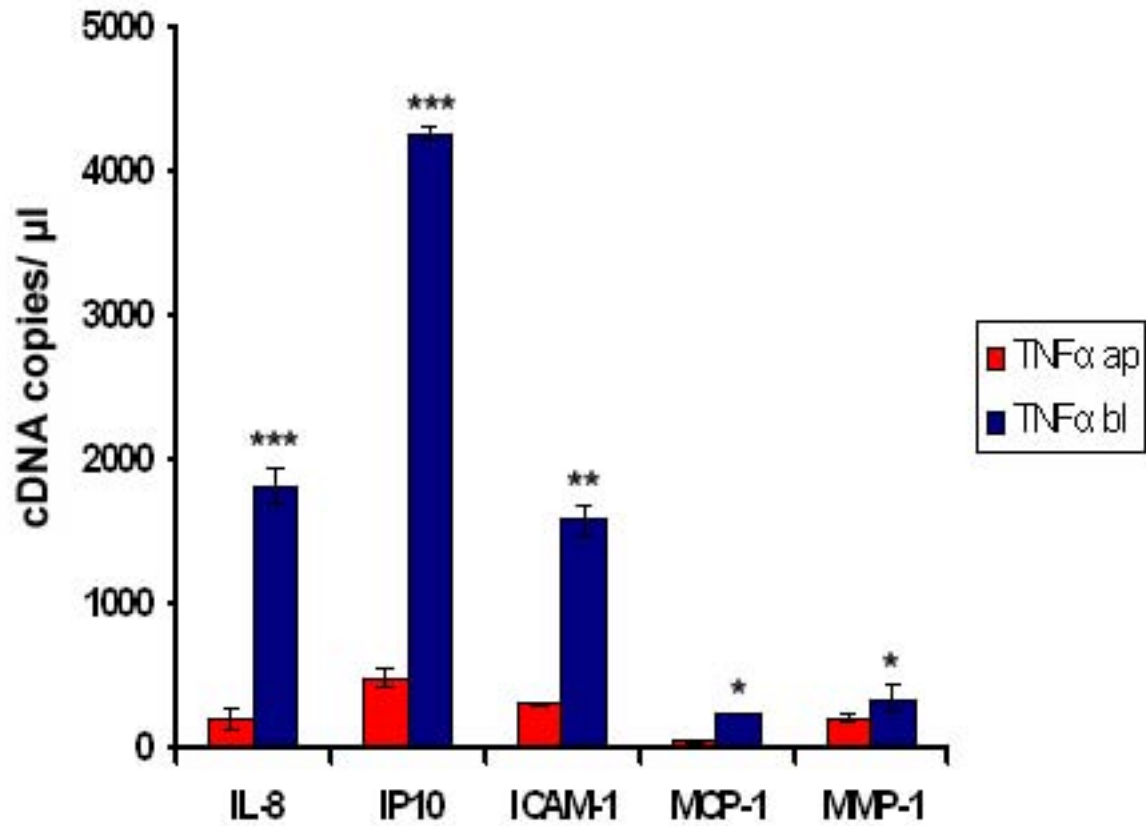

Supplement: MOESM8 [file 9439210]
